# Supplementary material
Source: PubMed Central journal article supplement (PMC298774)

**A** Evoked AMPARc Rise-time

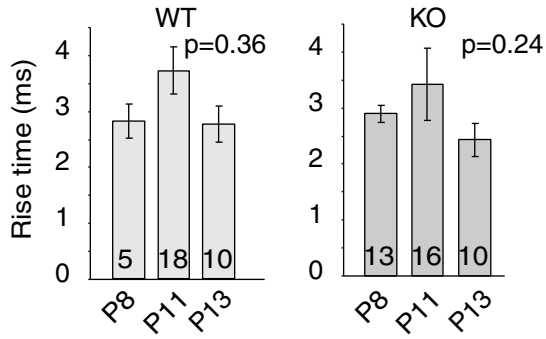

**B** Evoked NMDARc/AMPArc Ratio

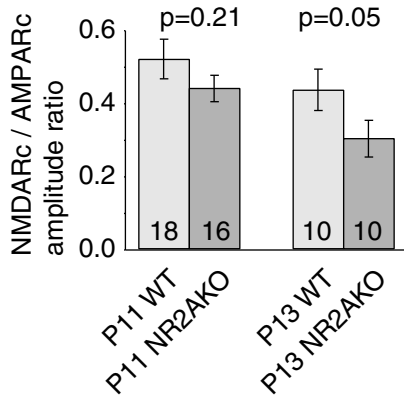

**C** Spontaneous AMPARc Amplitude

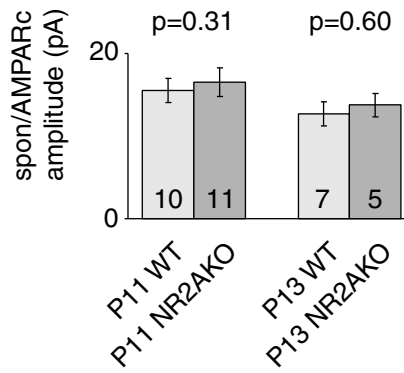

**D** P13 WT - AMPARcs

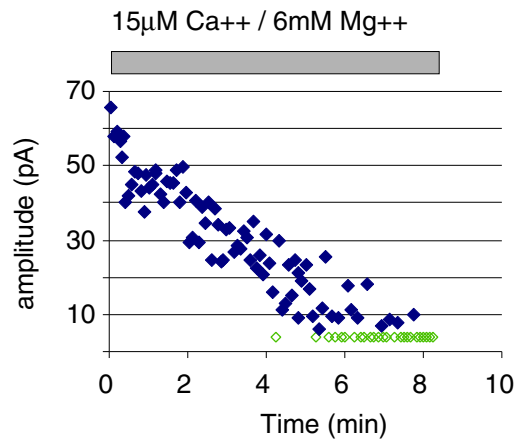

**E** P13 NR2AKO - AMPARcs

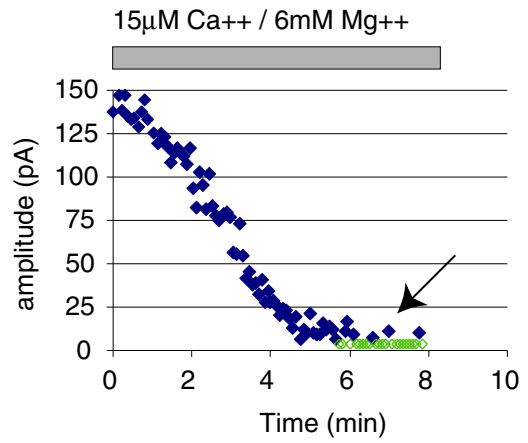

Supplement: pnas_0335786100_4.pdf [file pnas_0335786100_4.pdf]
