# Supplementary material
Source: PubMed Central journal article supplement (PMC298774)

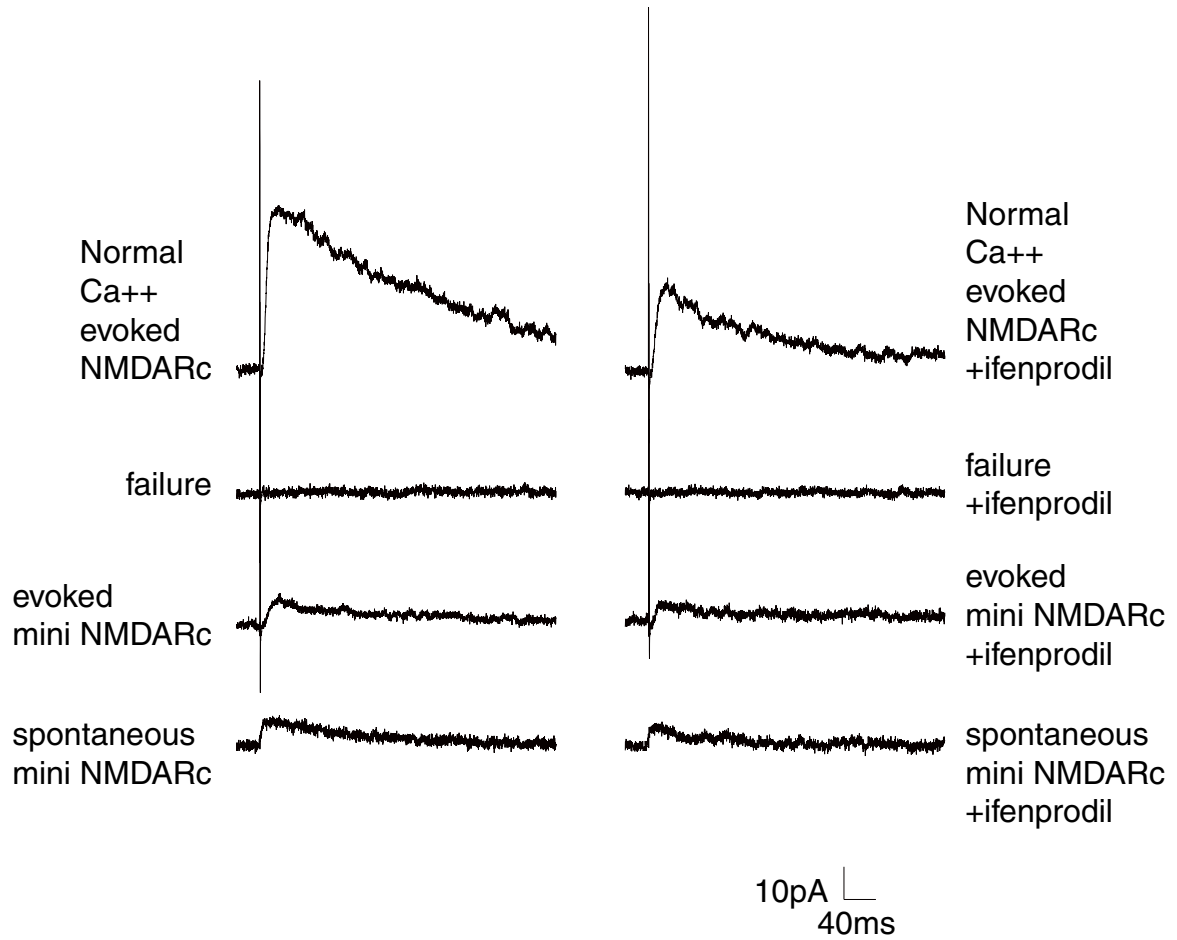

Supplement: pnas_0335786100_2.pdf [file pnas_0335786100_2.pdf]

### A Comparison of Paired Pulse

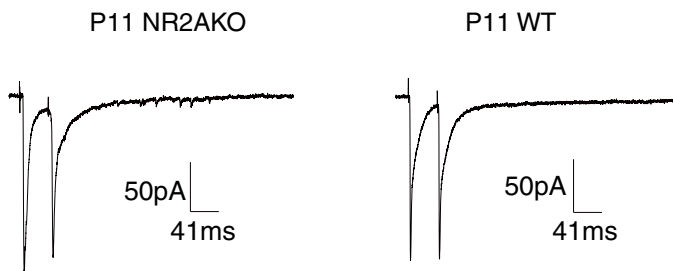

### B Paired Pulse Ratios

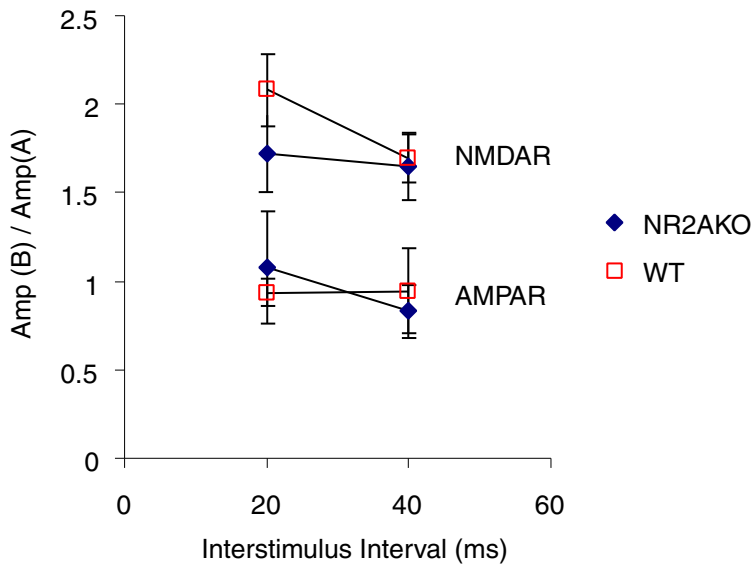

Supplement: pnas_0335786100_6.pdf [file pnas_0335786100_6.pdf]
